# Supplementary material for: Chemical Treatments on Invasive Bivalve, <em>Corbicula fluminea</em>
Source: Preprints.org preprint supplement (doi:10.20944/preprints202405.0260.v1), 2024-05-06
Supplement: Supplementary file 2 [file supplementary]

**Table S1.** Geo-referenced records of *Corbicula fluminea* in Massachusetts, 1999-2023.
